# Supplementary material for: Valstybės tarnautojų mokymo ir kvalifikacijostobulinimo sistemos vystymas: Panevėžio miesto savivaldybėsadministracijos atvejis
Source: Royal Society of Chemistry journal article supplement (doi:10.1039/c3dt52873a), 2011-01-01
Supplement: c3dt52873a1.pdf [file c3dt52873a1.pdf]

## Supporting Information

### Novel Ruthenium Sensitizers with A Dianionic Tridentate Ligand for Dye-Sensitized Solar Cells: Relationship Between the Solar Cell Performances and the Electron-Withdrawing Ability of Substituents at the Ligand

Hironobu Ozawa, Shunsuke Honda, Daichi Katano, Takahito Sugiura and Hironori Arakawa\*

Department of Industrial Chemistry, Faculty of Engineering, Tokyo University of Science, 12-1, Ichigaya-Funagawara, Shinjuku, Tokyo, 162-0826, JAPAN

E-mail: h.arakawa@ci.kagu.tus.ac.jp; Fax: (+81) 3 5261 4631; Tel: (+81) 3 5228 8311

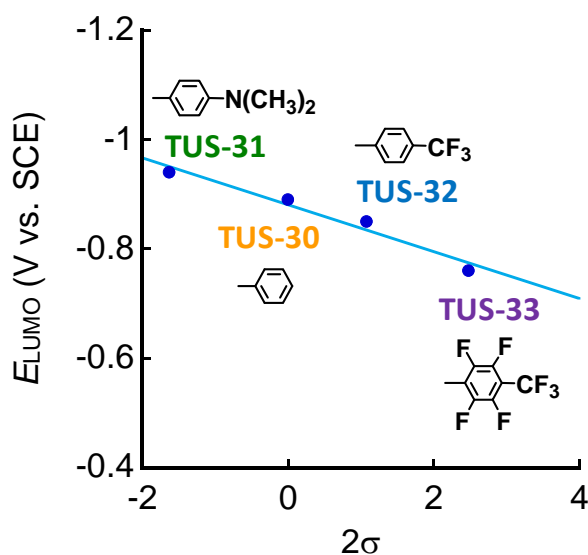

**Figure S1.** Relationship between the energy levels of LUMOs ( $E_{LUMO}$ ) of TUS sensitizers and the Hammett constants of the substituents ( $2\sigma$ ) at the dianionic tridentate ligands.

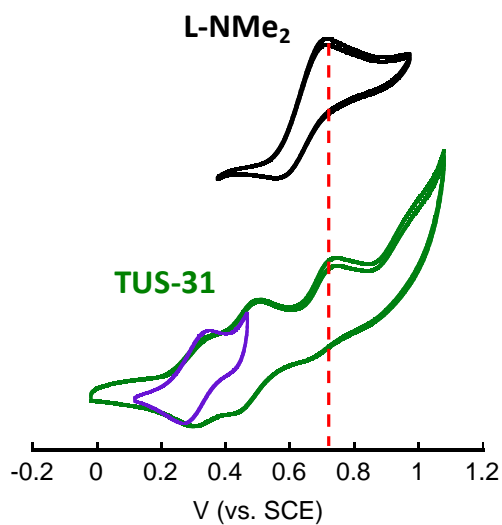

**Figure S2.** Cyclic voltammograms of **TUS-31** and its ligand (**L-NMe<sub>2</sub>**) in DMSO.

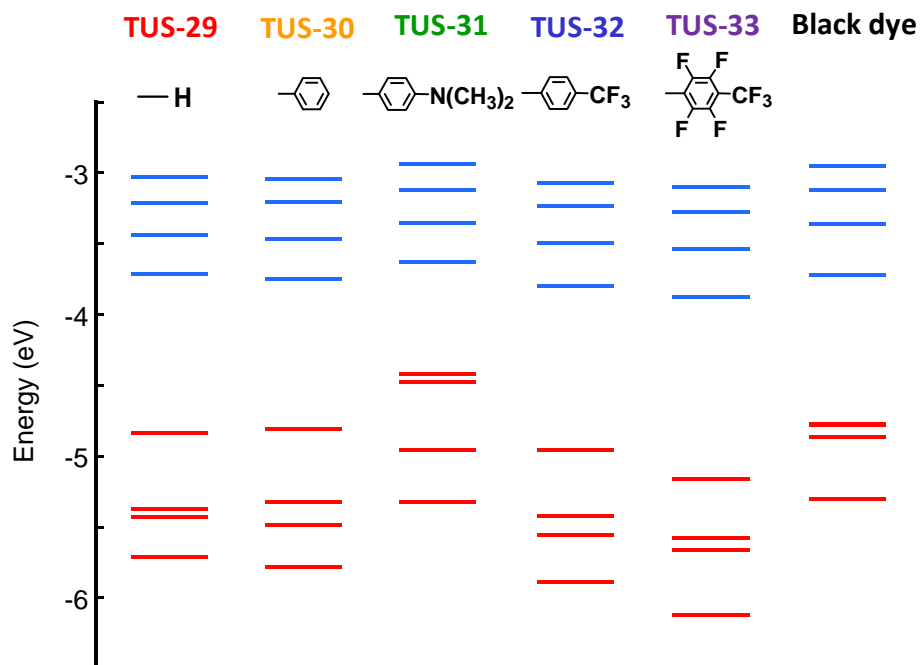

**Figure S3.** Energy diagrams of the frontier molecular orbitals of fully optimized structures of TUS sensitizers and Black dye in acetonitrile.

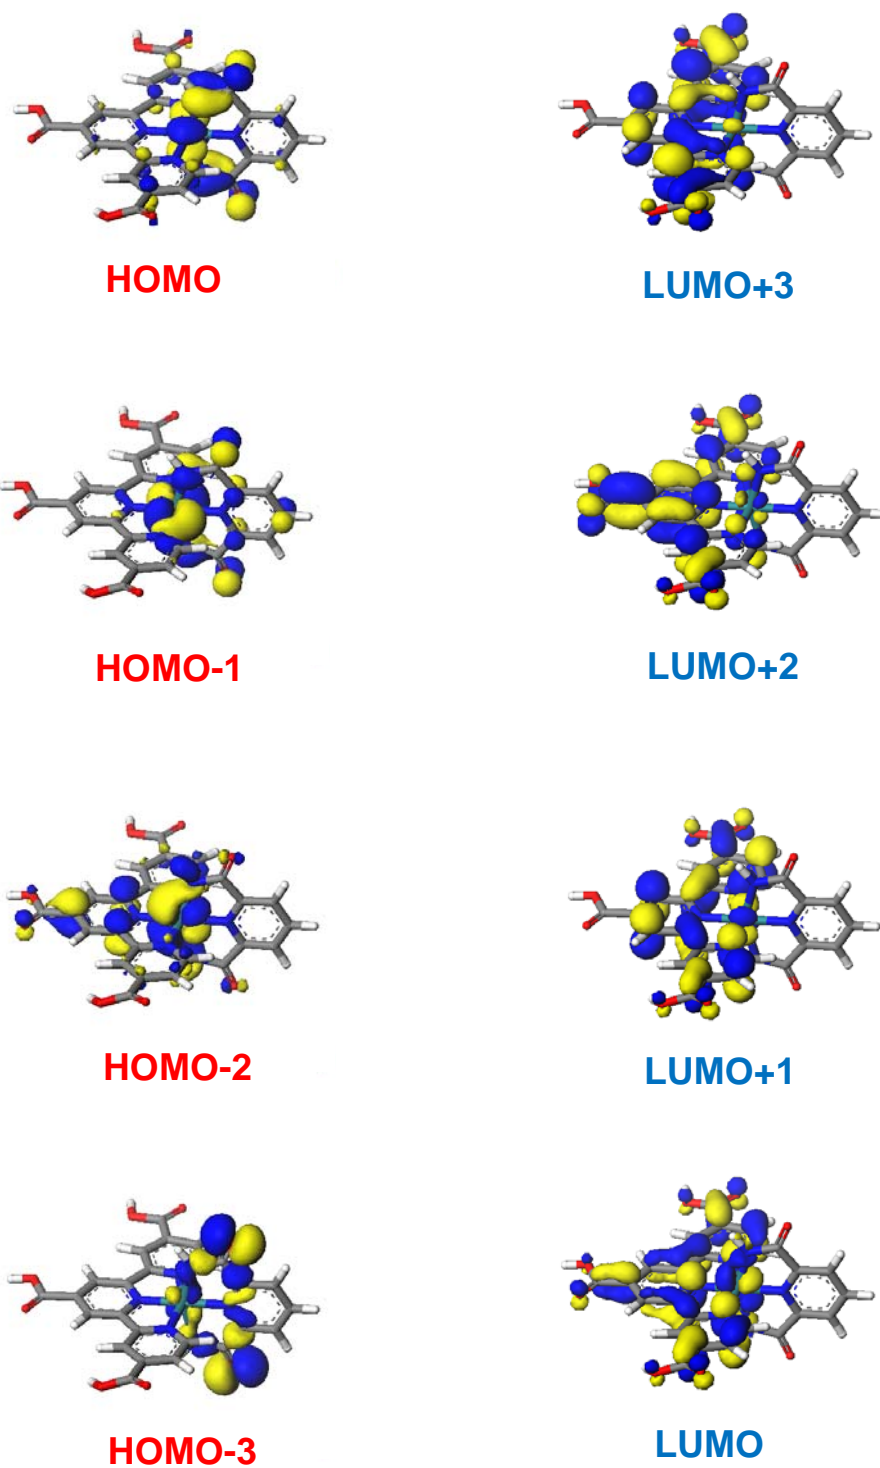

**Figure S4.** Frontier molecular orbitals (occupied and unoccupied MOs) of a fully optimized structure of **TUS-29** in acetonitrile.

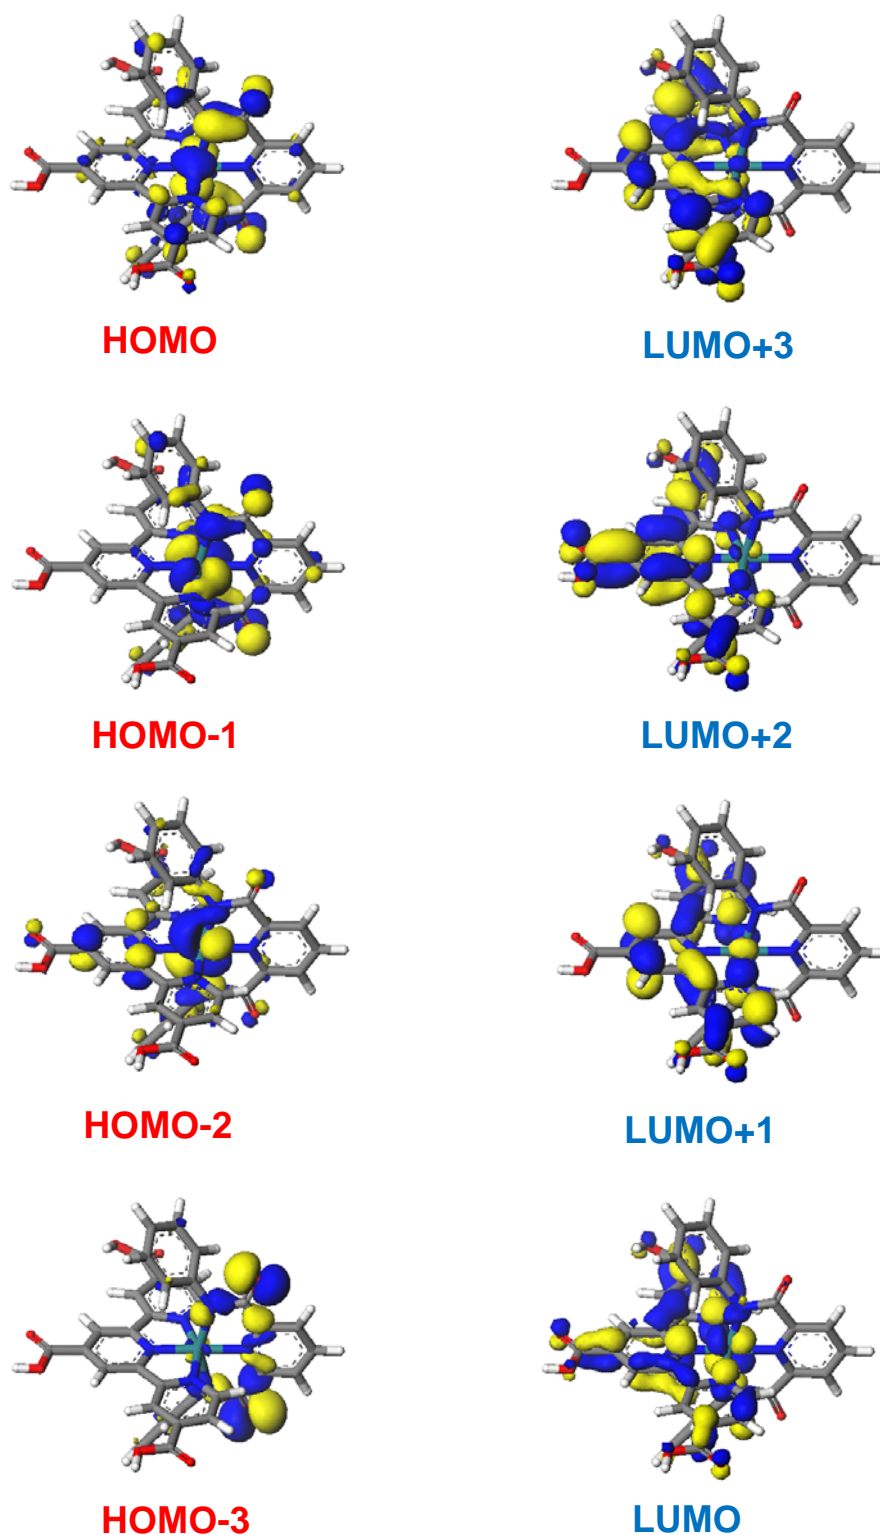

**Figure S5.** Frontier molecular orbitals (occupied and unoccupied MOs) of a fully optimized structure of **TUS-30** in acetonitrile.

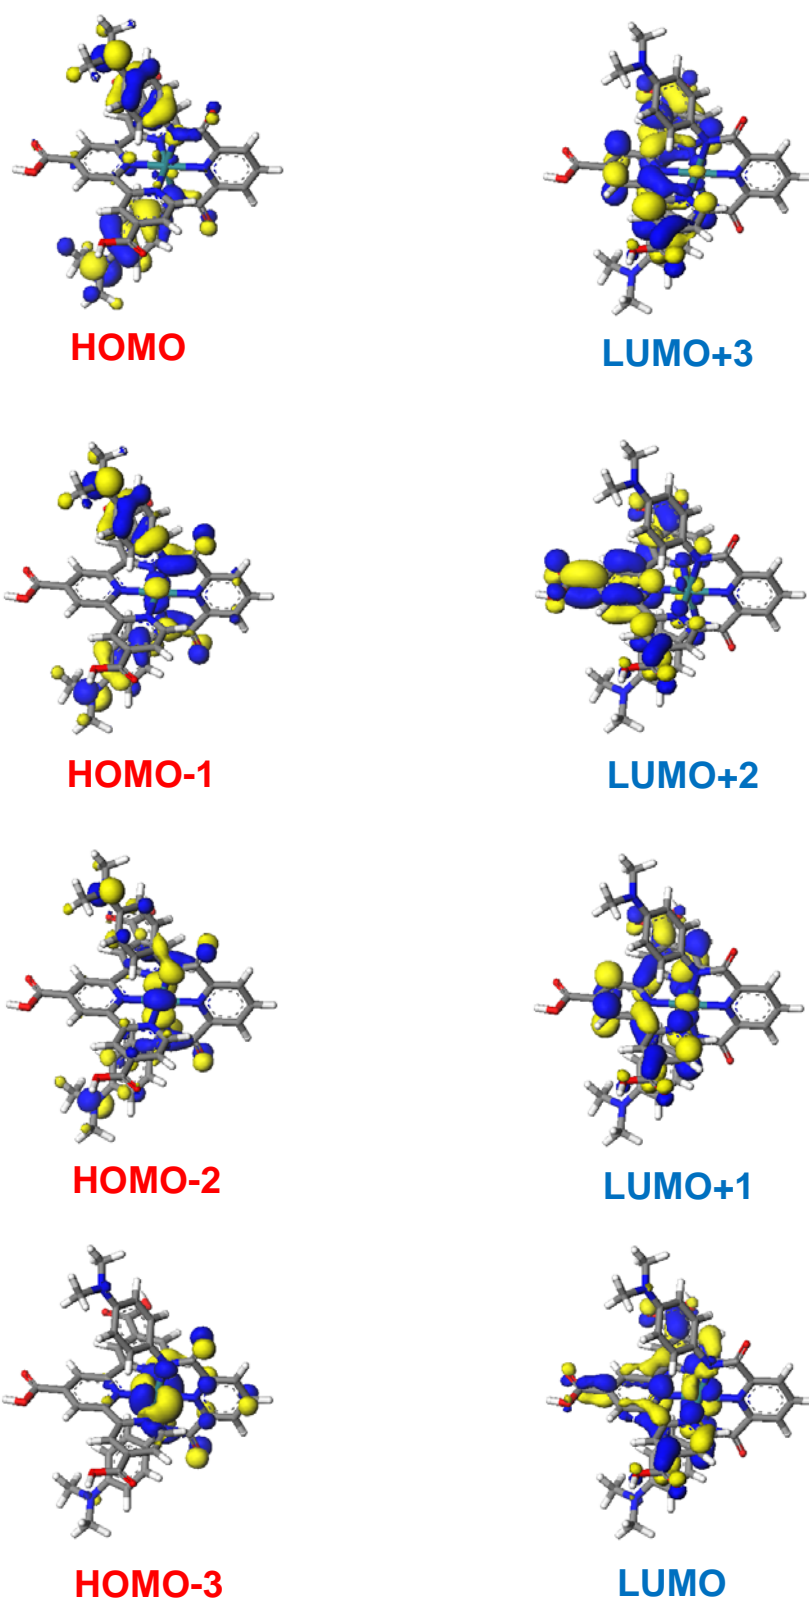

**Figure S6.** Frontier molecular orbitals (occupied and unoccupied MOs) of a fully optimized structure of **TUS-31** in acetonitrile.

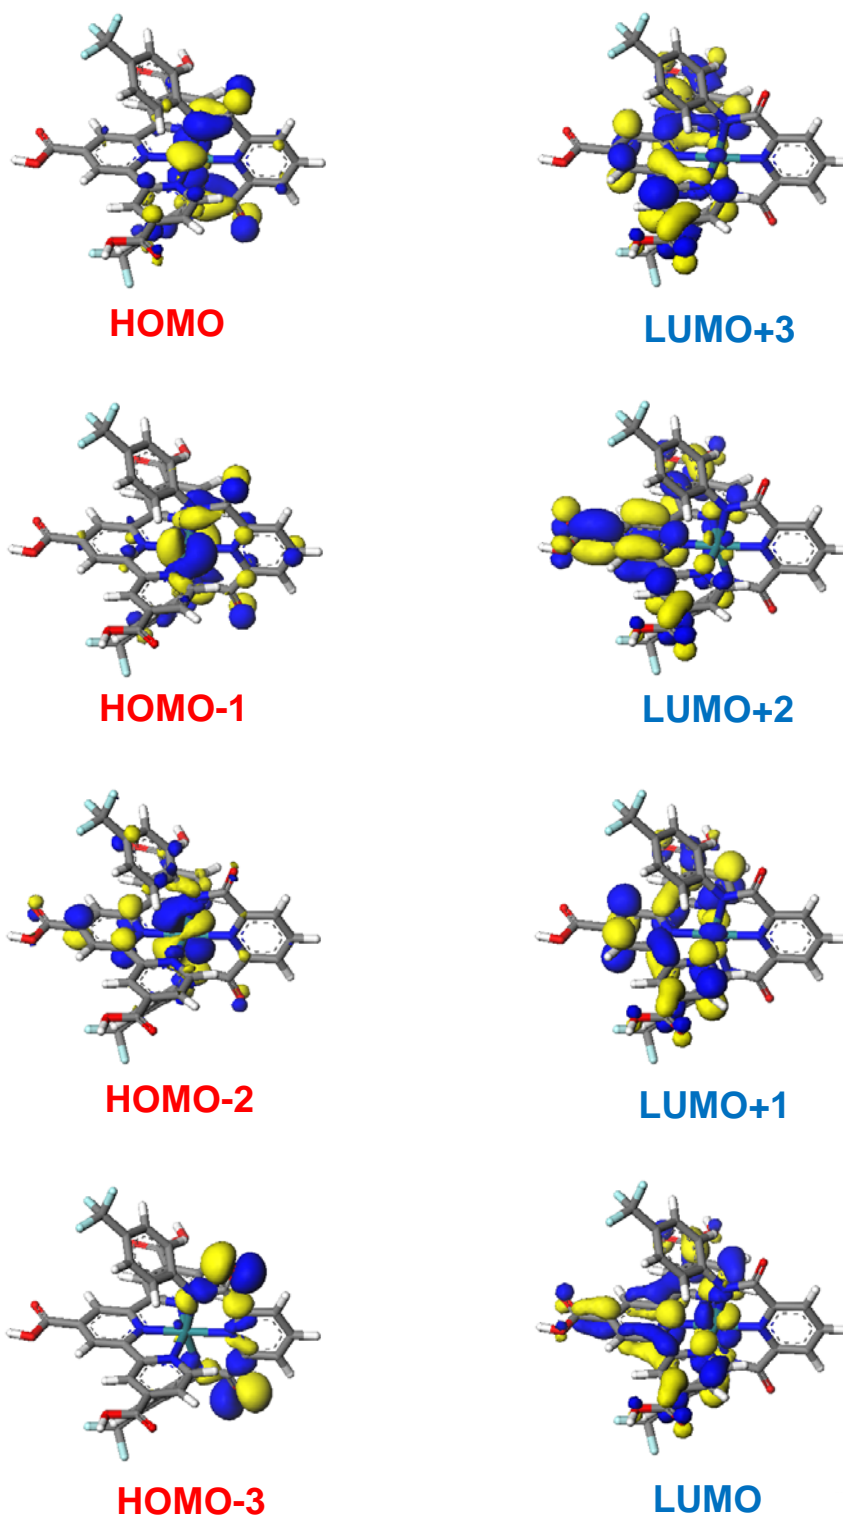

**Figure S7.** Frontier molecular orbitals (occupied and unoccupied MOs) of a fully optimized structure of TUS-32 in acetonitrile.

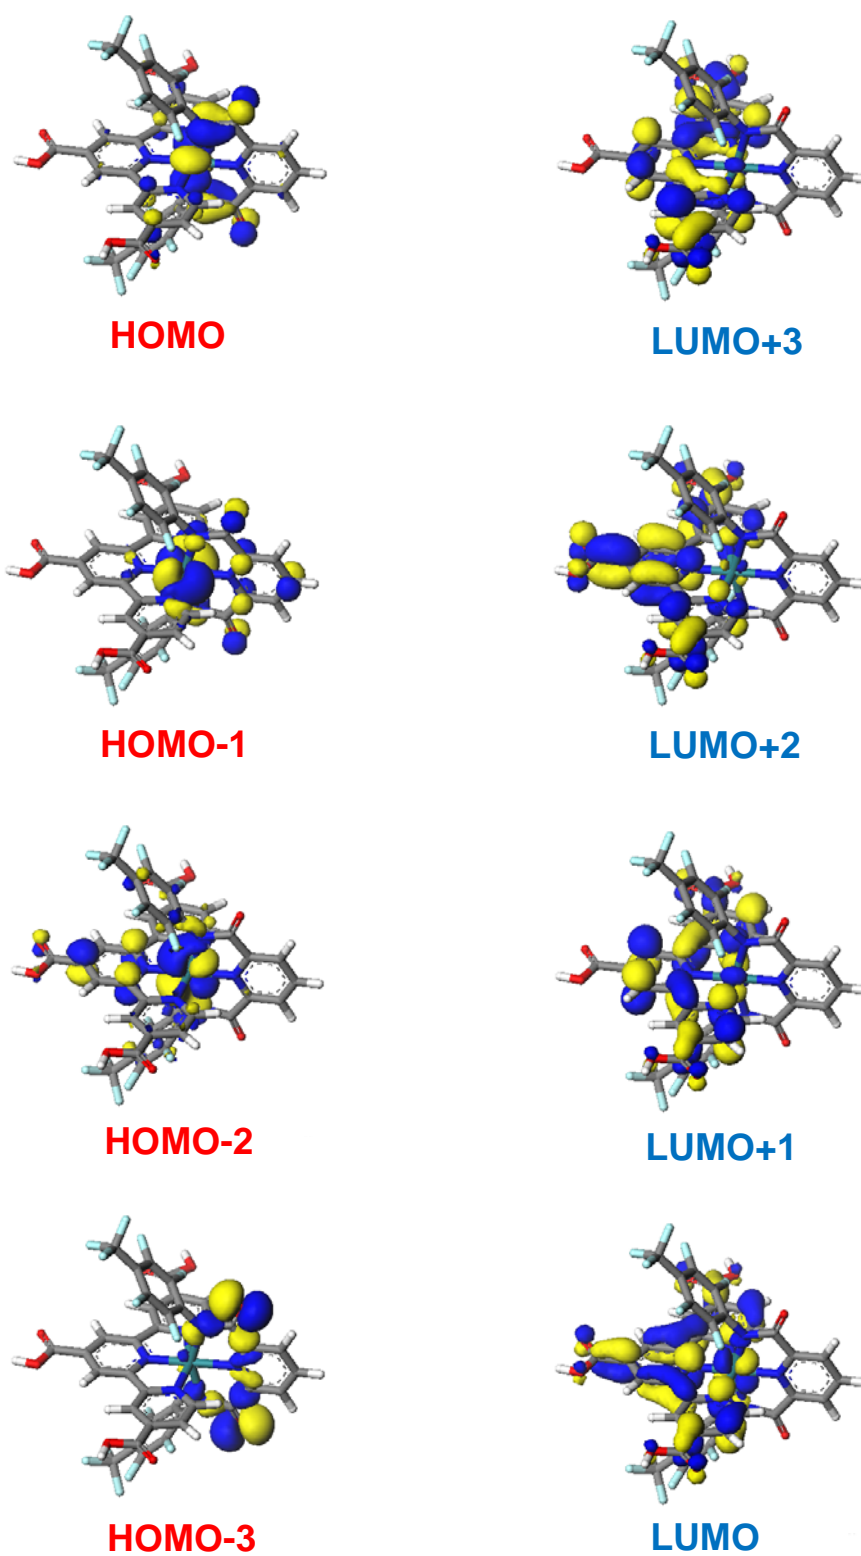

**Figure S8.** Frontier molecular orbitals (occupied and unoccupied MOs) of a fully optimized structure of **TUS-33** in acetonitrile.
